# Supplementary material for: Magnetic Solid-Phase Extraction of Carbamate Pesticides Using Magnetic Metal–Organic Frameworks Derived from Benzoate Ligands, Followed by Digital Image Colorimetric Screening and High-Performance Liquid Chromatography Analysis
Source: PubMed Central journal article supplement — ACS Omega. 2022 Mar 30;7(14):12202–11. doi: 10.1021/acsomega.2c00596 (PMC9016810; doi:10.1021/acsomega.2c00596), 2022-03-30
Supplement: ao2c00596_si_001.pdf [file ao2c00596_si_001.pdf]

## Supplementary Information

### **Magnetic Solid-Phase Extraction of Carbamate Pesticides Using Magnetic Metal–Organic Frameworks Derived from Benzoate Ligands, Followed by Digital Image Colorimetric Screening and High-Performance Liquid Chromatography Analysis**

Jirasak Gamonchuang<sup>1</sup>, Yanawath Santaladchaiyakit<sup>2</sup>, Rodjana Burakham<sup>1\*</sup>

<sup>1</sup>Materials Chemistry Research Center, Department of Chemistry, Faculty of Science, Khon Kaen University, Khon Kaen 40002, Thailand

<sup>2</sup>Department of Chemistry, Faculty of Engineering, Rajamangala University of Technology Isan, Khon Kaen Campus, Khon Kaen 40000, Thailand

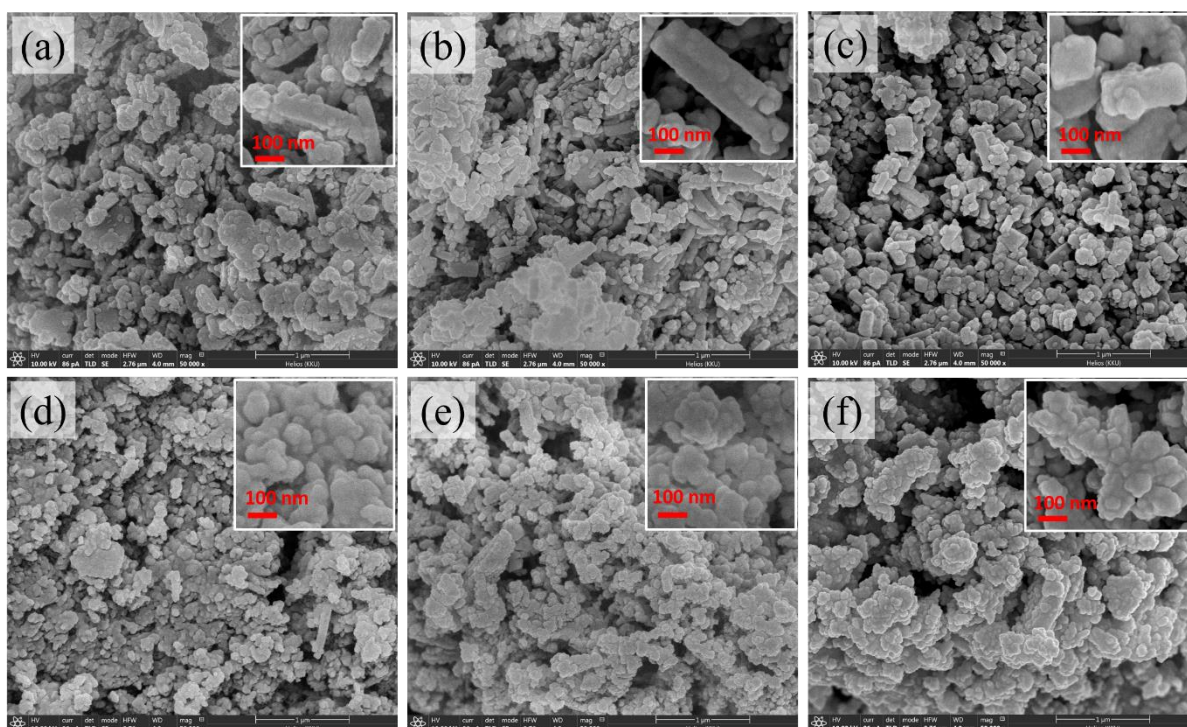

**Figure S1.** SEM images of (a) bare Fe-Al MMH, (b) Fe-Al MMH@MOF(Fe-H<sub>2</sub>BDC), (c) Fe-Al MMH@MOF(Fe-H<sub>2</sub>BDC-NH<sub>2</sub>), (d) Fe-Al MMH@MOF(Fe-H<sub>2</sub>BDC-DH), (e) Fe-Al MMH@MOF(Fe-H<sub>3</sub>BTC), and (f) Fe-Al MMH@MOF(Fe-H<sub>4</sub>BTtC).

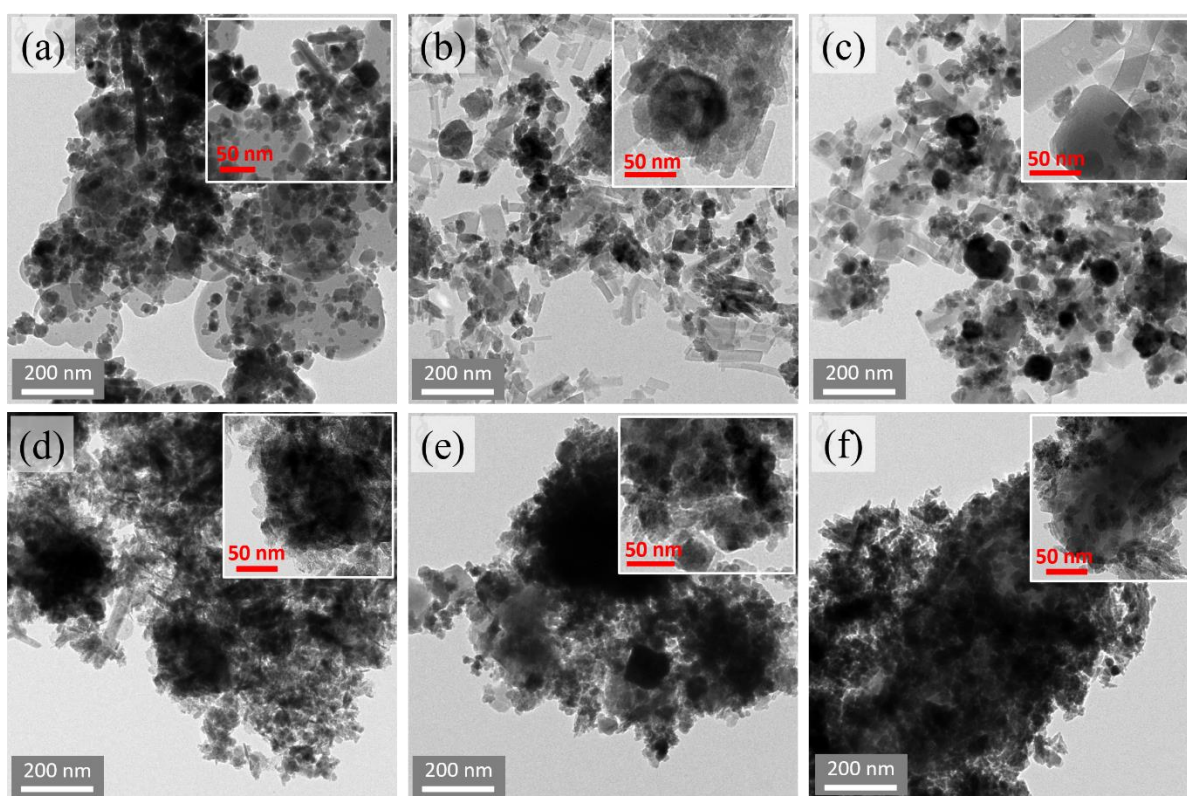

**Figure S2.** TEM images of (a) bare Fe-Al MMH, (b) Fe-Al MMH@MOF(Fe-H<sub>2</sub>BDC), (c) Fe-Al MMH@MOF(Fe-H<sub>2</sub>BDC-NH<sub>2</sub>), (d) Fe-Al MMH@MOF(Fe-H<sub>2</sub>BDC-DH), (e) Fe-Al MMH@MOF(Fe-H<sub>3</sub>BTC), and (f) Fe-Al MMH@MOF(Fe-H<sub>4</sub>BTtC).

TGA was performed at temperatures between 40–900 °C under a N<sub>2</sub> atmosphere. The TG curves of the bare Fe-Al MMH and Fe-Al MMH@MOF composites are illustrated in Figure S3. Two stages of thermal decomposition were observed for bare Fe-Al MMH. The first stage of weight loss (7 wt%) was found at temperatures between 40–290 °C, corresponding to the removal of water and DMF from inner and outer particles. The second stage appeared from 600 °C to 800 °C, indicating its phase transition. For Fe-Al MMH@MOF(Fe-H<sub>2</sub>BDC) and Fe-Al MMH@MOF(Fe-H<sub>2</sub>BDC-NH<sub>2</sub>), weight loss was found from 40 °C to 290 °C, and was attributed to the decomposition of water and DMF (Figure S3(b, c)). The weight losses of approximately 27 wt% (350–570 °C) and 14 wt% (350–570 °C) were due to the decomposition of the framework and removal of H<sub>2</sub>BDC and H<sub>2</sub>BDC-NH<sub>2</sub> ligands, respectively. The final stage of weight loss (16 wt%) was observed in the range of 700–840 °C due to the decomposition of the H<sub>2</sub>BDC-NH<sub>2</sub> ligand. In Figure S3(d–f), the first stage of mass conversion was observed from 40 to 100 °C, corresponding to dehydration on the surface. Thermal decomposition of MMOF was found between 200–520 °C. Weight losses of approximately 18 wt%, 28 wt% and 27 wt% were suggested for the removal of H<sub>2</sub>BDC-DH, H<sub>3</sub>BTC and H<sub>4</sub>BTtC ligands from MMOF, respectively. These results confirmed the existence of a composite material between Fe-Al MMH and MOFs.<sup>23-</sup>

24, 27–29

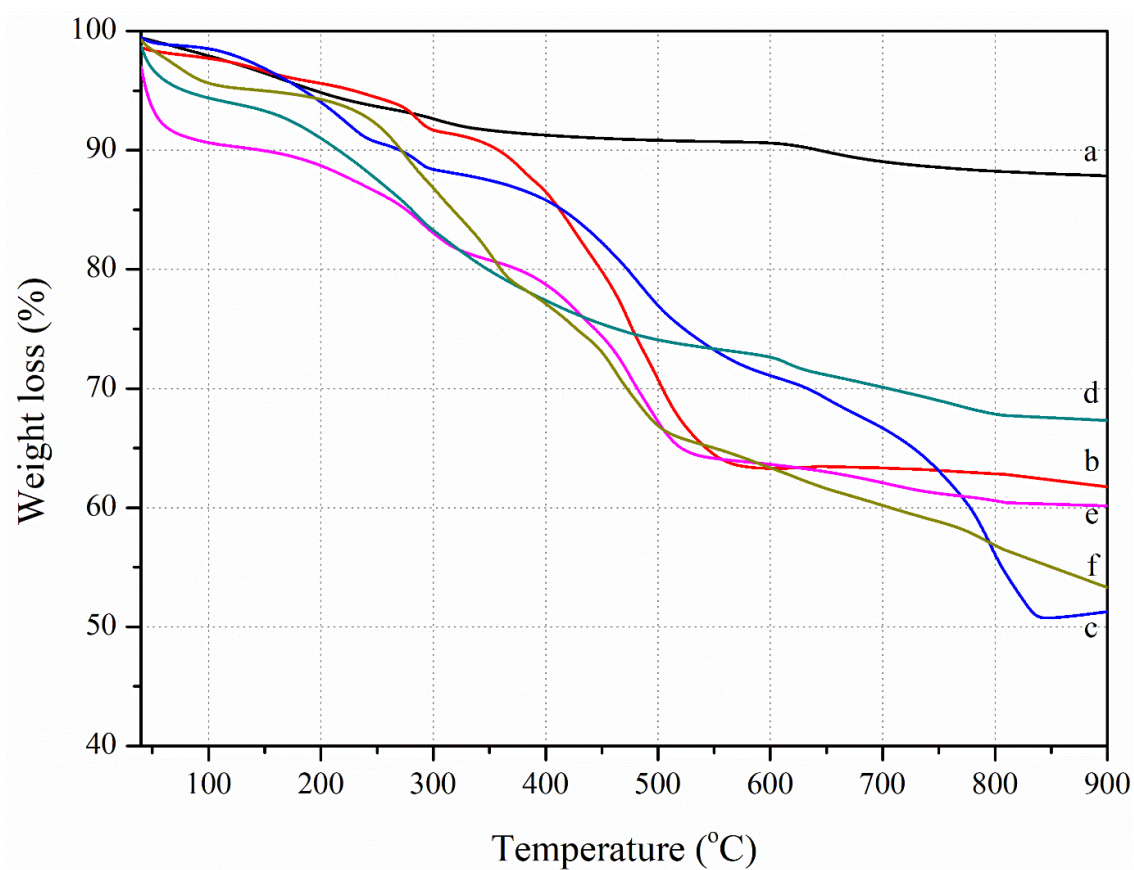

**Figure S3.** TG curves of (a) bare Fe-Al MMH, (b) Fe-Al MMH@MOF(Fe-H<sub>2</sub>BDC), (c) Fe-Al MMH@MOF(Fe-H<sub>2</sub>BDC-NH<sub>2</sub>), (d) Fe-Al MMH@MOF(Fe-H<sub>2</sub>BDC-DH), (e) Fe-Al MMH@MOF(Fe-H<sub>3</sub>BTC), and (f) Fe-Al MMH@MOF(Fe-H<sub>4</sub>BTiC).



The magnetic properties of the as-prepared sorbents were measured, as shown in Figure S4. The appearances of the hysteresis, remanence, and coercivity values demonstrated that all magnetic sorbents were ferromagnetic materials. The saturated magnetization of bare Fe-Al MMH was approximately  $40.3 \text{ emu g}^{-1}$ , while the composite materials attained values of 15.4, 31.0, 16.0, 32.5, and  $14.0 \text{ emu g}^{-1}$  for Fe-Al MMH@MOF(Fe-H<sub>2</sub>BDC), Fe-Al MMH@MOF(Fe-H<sub>2</sub>BDC-NH<sub>2</sub>), Fe-Al MMH@MOF(Fe-H<sub>2</sub>BDC-DH), Fe-Al MMH@MOF(Fe-H<sub>3</sub>BTC), and Fe-Al MMH@MOF(Fe-H<sub>4</sub>BTtC), respectively. The presence of paramagnetic MOFs resulted in a decrease in the magnetization values of the synthesized composites. In the MSPE procedure, however, it was sufficient for complete phase isolation within 1 min.

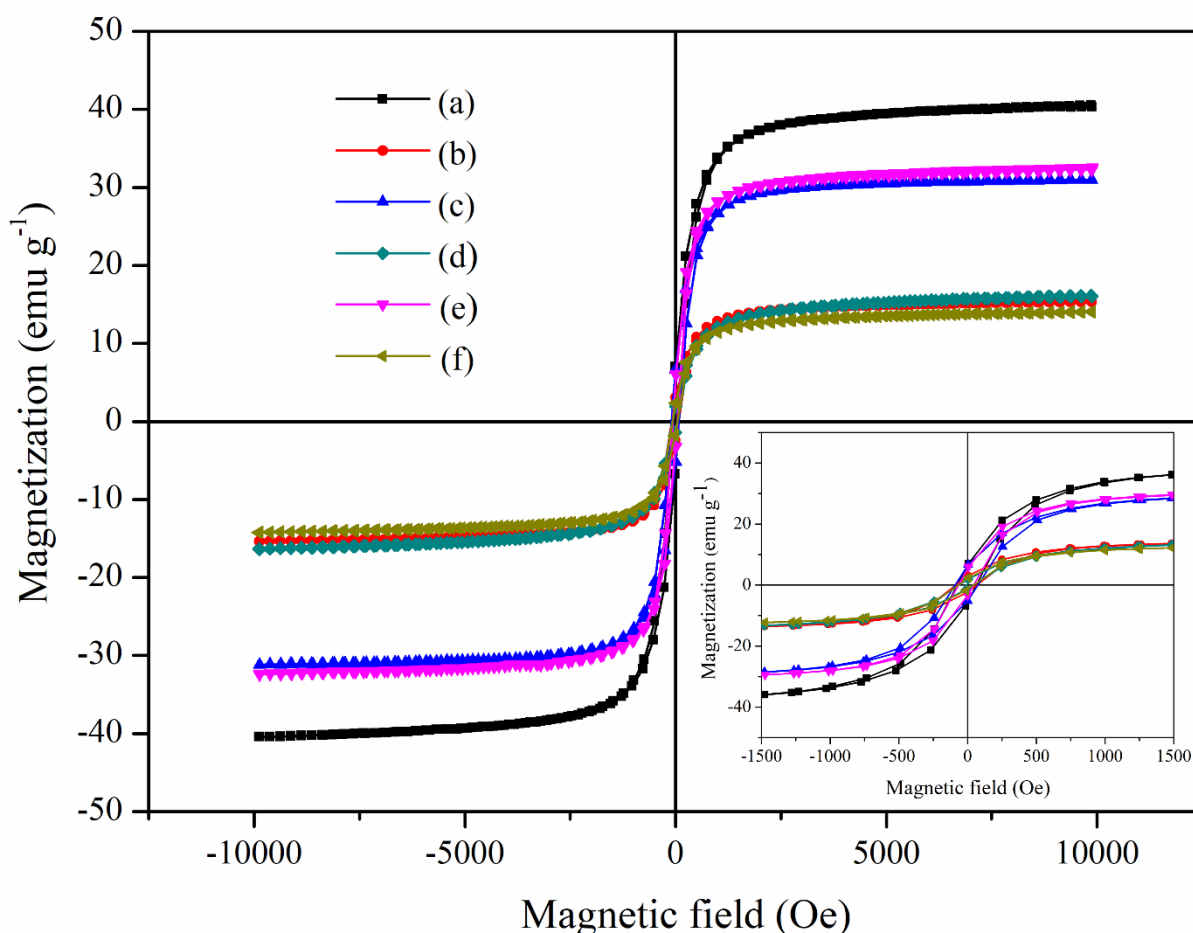

**Figure S4.** Magnetic properties of (a) bare Fe-Al MMH, (b) Fe-Al MMH@MOF(Fe-H<sub>2</sub>BDC), (c) Fe-Al MMH@MOF(Fe-H<sub>2</sub>BDC-NH<sub>2</sub>), (d) Fe-Al MMH@MOF(Fe-H<sub>2</sub>BDC-DH), (e) Fe-Al MMH@MOF(Fe-H<sub>3</sub>BTC), and (f) Fe-Al MMH@MOF(Fe-H<sub>4</sub>BTtC).

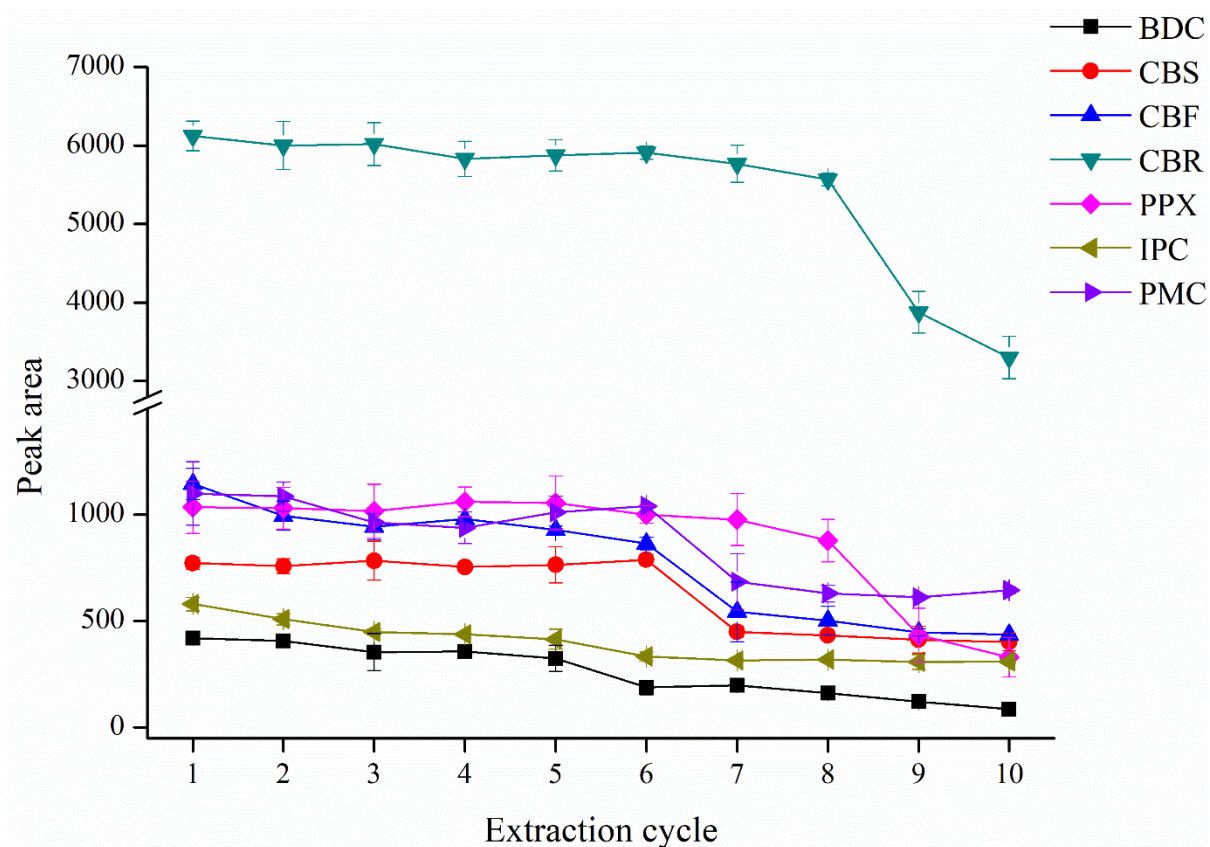

**Figure S5.** Reusability of the Fe-Al MMH@MOF(Fe-H<sub>2</sub>BDC) sorbent.

**Table S1.** Analytical performance of the proposed MSPE coupled with digital image colorimetry.

| Analyte                 | Linear range<br>( $\mu\text{g L}^{-1}$ ) | Linear equation     | $R^2$  | RSD (%)  |                  | DI water                 |                          | Long bean                |                          | Orange                   |                          |
|-------------------------|------------------------------------------|---------------------|--------|----------|------------------|--------------------------|--------------------------|--------------------------|--------------------------|--------------------------|--------------------------|
|                         |                                          |                     |        | Intraday | Interday         | LOD                      | LOQ                      | LOD                      | LOQ                      | LOD                      | LOQ                      |
|                         |                                          |                     |        | (n=5)    | (n=5 $\times$ 3) | ( $\mu\text{g L}^{-1}$ ) |
| BDC                     | 60.0–500.0                               | $y = 0.53x + 6.40$  | 0.9982 | 7.9      | 9.8              | 18.0                     | 60.0                     | 20.0                     | 60.0                     | 20.0                     | 60.0                     |
| CBS                     | 26.0–300.0                               | $y = 0.12x + 3.00$  | 0.9832 | 3.1      | 9.0              | 8.0                      | 26.0                     | 15.0                     | 40.0                     | 15.0                     | 40.0                     |
| CBF                     | 30.0–500.0                               | $y = 0.10x + 5.40$  | 0.9994 | 3.4      | 6.9              | 9.5                      | 30.0                     | 15.0                     | 40.0                     | 15.0                     | 40.0                     |
| CBR                     | 6.0–100.0                                | $y = 0.53x + 2.90$  | 0.9981 | 0.4      | 1.2              | 2.0                      | 6.0                      | 3.0                      | 10.0                     | 4.0                      | 12.0                     |
| PPX                     | 8.0–100.0                                | $y = 0.37x + 8.00$  | 0.9903 | 7.3      | 8.1              | 2.5                      | 8.0                      | 5.0                      | 15.0                     | 5.0                      | 15.0                     |
| IPC                     | 7.0–100.0                                | $y = 0.47x + 6.50$  | 0.9874 | 4.2      | 6.5              | 2.0                      | 7.0                      | 10.0                     | 30.0                     | 10.0                     | 30.0                     |
| PMC                     | 9.0–100.0                                | $y = 0.35x + 9.00$  | 0.9887 | 0.5      | 1.3              | 3.0                      | 9.0                      | 10.0                     | 30.0                     | 10.0                     | 30.0                     |
| Mixed<br>(7 carbamates) | 3.0–100.0                                | $y = 0.92x + 11.00$ | 0.9638 | 1.6      | 7.3              | 1.0                      | 3.0                      | 1.0                      | 3.0                      | 1.0                      | 3.0                      |



**Table S2.** Sorption capacity of the studied magnetic sorbents

| Sorbent                                               | $Q_{\max}$ (mg kg <sup>-1</sup> ) |      |      |      |      |      |      |
|-------------------------------------------------------|-----------------------------------|------|------|------|------|------|------|
|                                                       | BDC                               | CBS  | CBF  | CBR  | PPX  | IPC  | PMC  |
| Fe-Al MMH                                             | 1435                              | 1141 | 759  | 486  | 466  | 2714 | 1871 |
| Fe-Al MMH@MOF(Fe-H <sub>2</sub> BDC) <sup>a</sup>     | 3343                              | 3200 | 2823 | 2993 | 2193 | 3327 | 4196 |
| Fe-Al MMH@MOF(Fe-H <sub>2</sub> BDC) <sup>b</sup>     | 3193                              | 3176 | 2750 | 2978 | 2037 | 3096 | 4116 |
| Fe-Al MMH@MOF(Fe-H <sub>2</sub> BDC) <sup>c</sup>     | 3018                              | 3115 | 2690 | 2907 | 1984 | 3015 | 3925 |
| Fe-Al MMH@MOF(Fe-H <sub>2</sub> BDC-NH <sub>2</sub> ) | 1949                              | 2908 | 2638 | 2815 | 2110 | 3160 | 3808 |
| Fe-Al MMH@MOF(Fe-H <sub>2</sub> BDC-DH)               | 1016                              | 1321 | 948  | 1205 | 1144 | 1866 | 2034 |
| Fe-Al MMH@MOF(Fe-H <sub>3</sub> BTC)                  | 1352                              | 1424 | 964  | 1249 | 1362 | 1434 | 2090 |
| Fe-Al MMH@MOF(Fe-H <sub>4</sub> BTtC)                 | 1110                              | 1458 | 1127 | 1102 | 534  | 3202 | 2163 |

<sup>a</sup> Evaluated in DI water.

<sup>b</sup> Evaluated in long bean extract.

<sup>c</sup> Evaluated in orange extract.

**Table S3.** Comparison of the proposed MSPE method with other methods based on MMOF sorbents for carbamate determination.

| Magnetic sorbent <sup>Ref.</sup>                                               | Analytes                                     | Sample matrix                                                                              | Analysis method                       | Analytical performance                                                                                                                                                                                                                                                                 |
|--------------------------------------------------------------------------------|----------------------------------------------|--------------------------------------------------------------------------------------------|---------------------------------------|----------------------------------------------------------------------------------------------------------------------------------------------------------------------------------------------------------------------------------------------------------------------------------------|
| Zn/Co-MOF-5 <sup>15</sup>                                                      | Methomyl, 3-hydroxycarbofuran, CBF, IPC      | Drinking water and tomato                                                                  | HPLC-MS/MS                            | Linear range: 0.05–20 ng mL <sup>-1</sup> ,<br>0.1–40 ng g <sup>-1</sup><br>LODs: 0.0006–0.013 ng mL <sup>-1</sup> ,<br>0.001–0.01 ng g <sup>-1</sup><br>RSDs: < 14%<br>%R: 86.1–109.1<br>Reusability: Not reported<br>$Q_{\max}$ : 63.22–87.33 mg g <sup>-1</sup><br>EF: Not reported |
| Magnetic porous covalent triazine-based organic polymer (M-PCTP) <sup>16</sup> | PPX, CBR, IPC, fenobucarb, and diethofencarb | Lemonade and grape juice                                                                   | HPLC-MS                               | Linear range: 0.06–80 ng mL <sup>-1</sup><br>LODs: 0.02–0.3 ng mL <sup>-1</sup><br>LOQs: 0.06–0.9 ng mL <sup>-1</sup><br>RSDs: < 6.2%<br>%R: 86.3–108.0<br>Reusability: 20 cycles<br>$Q_{\max}$ : Not reported<br>EF: Not reported                                                     |
| Fe <sub>3</sub> O <sub>4</sub> -doped porous carbon (MPC) <sup>22</sup>        | PPX, CBR, IPC, and fenobucarb                | Apple                                                                                      | HPLC-UV                               | Linear range: 1–100 ng g <sup>-1</sup><br>LOQs: 0.1–0.2 ng g <sup>-1</sup><br>RSDs: < 5.7%<br>%R: 89.3–109.7<br>Reusability: 13 cycles<br>$Q_{\max}$ : Not reported<br>EF: Not reported                                                                                                |
| Fe-Al MMH@MOF(Fe-H <sub>2</sub> BDC) <sup>This study</sup>                     | BDC, CBS, CBF, CBR, PPX, IPC, and PMC        | Guava, pomelo, pineapple, watermelon, orange, mango, grape, long bean, and Chinese cabbage | Digital image colorimetry and HPLC-UV | Linear range: 0.015–1000 µg L <sup>-1</sup><br>LODs: 0.005–0.09 µg L <sup>-1</sup><br>LOQs: 0.015–0.3 µg L <sup>-1</sup><br>RSDs: <10.7%<br>%R: 74.9–122.7<br>Reusability: 8 cycles<br>$Q_{\max}$ : 2823–4196 mg kg <sup>-1</sup><br>EF: 29–184                                        |
